# Supplementary material for: Is Self-Reported Physical Fitness Useful for Estimating Fitness Levels in Children and Adolescents? A Reliability and Validity Study
Source: MDPI journal article supplement (doi:10.3390/medicina55060286), 2019-06-18
Supplement: s1 [file s1]

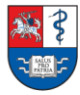

Supplementary material

**Table S1.** Means of performance by physical fitness tests in children (3 to 10 years).

| Measured physical fitness  | Low/poor (mean) | Good/Great (mean) |
|----------------------------|-----------------|-------------------|
| Cardiorespiratory fitness: |                 |                   |
| 20-m shuttle run (stage)   | 2.5             | 4.4               |
| Muscular fitness:          |                 |                   |
| Handgrip (kg)              | 6.4             | 14.2              |
| Standing long jump (cm)    | 63.8            | 116.9             |
| Speed-Agility:             |                 |                   |
| Shuttle run 4 × 10 m (s)*  | 22.6            | 14.1              |
| Flexibility:               |                 |                   |
| Sit and reach (cm)         | 19.3            | 30.6              |

\* The lower the score (time in seconds) the better the performance.

**Table S2.** Means of performance by physical fitness tests in adolescent (11 to 17 years).

| Measured physical fitness | Very poor (mean) | Poor (mean) | Average (mean) | Good (mean) | Very good (mean) |
|---------------------------|------------------|-------------|----------------|-------------|------------------|
| Cardiorespiratory fitness |                  |             |                |             |                  |
| 20-m shuttle run (stage)  | 3.2              | 3.6         | 4.3            | 5.3         | 6.7              |
| Muscular fitness          |                  |             |                |             |                  |
| Handgrip (kg)             | 25.5             | 27.2        | 29.3           | 32.0        | 35.5             |
| Standing long jump (cm)   | 148.1            | 151.7       | 158.4          | 170.2       | 190.1            |
| Speed-Agility             |                  |             |                |             |                  |
| Shuttle run 4 × 10 m (s)* | 13.3             | 12.6        | 12.0           | 11.8        | 10.6             |
| Flexibility               |                  |             |                |             |                  |
| Sit and reach (cm)        | 15.4             | 18.1        | 21.3           | 24.4        | 27.5             |

\* The lower the score (time in seconds) the better the performance.
